# Supplementary material for: How intramolecular coordination bonding (ICB) controls the homolysis of the C–ON bond in alkoxyamines
Source: Royal Society of Chemistry journal article supplement (doi:10.1039/c9ra05334d), 2019-01-01
Supplement: c9ra05334d1.pdf [file c9ra05334d1.pdf]

## Supporting Information

for

### How Intramolecular Coordination Bonding (ICB) Control the Homolysis of the C—ON

#### Bond in Alkoxyamines

Mariya Edeleva,<sup>b,c\*</sup> Gérard Audran,<sup>a</sup> Elena Bagryanskaya,<sup>b,c</sup> Irina Bagryanskaya,<sup>b</sup> Jean-Patrick Joly,<sup>a</sup> Sylvain R. A. Marque,<sup>a,b</sup> Anna Iurchenkova,<sup>c</sup> Polina Kaletina,<sup>b,c</sup> Sergey Cherkasov,<sup>b,c</sup> Tung To Hai,<sup>a</sup> Evgeny Tretyakov,<sup>b,c</sup> and Svetlana Zhivetyeva<sup>b,c</sup>

<sup>a</sup> Aix Marseille Univ, CNRS, ICR, UMR 7273, case 551, Avenue Escadrille Normandie-Niemen, 13397 Marseille Cedex 20 France. <sup>b</sup> N. N. Vorozhtsov Novosibirsk Institute of Organic Chemistry SB RAS, 9 Pr. Lavrentjeva, Novosibirsk 630090, Russia. E-mail: edeleva@nioch.nsc.ru

<sup>c</sup> Novosibirsk State University, 2 Pirogova Str., Novosibirsk 630090, Russia.

1) Characterization of compounds

- a.  $^1\text{H}$ ,  $^{13}\text{C}$  NMR for **4-6** and HRMS data for **4-6**
- b. Measurements of  $k_d$  for compounds **6-*RS/SR***
- c. NMR data on py addition to the solution of  $[\text{Zn}(\text{hfac})_2(\mathbf{1}\text{-RS/SR})]$ ,  $[\text{Zn}(\text{hfac})_2(\mathbf{3}\text{-RS/SR})]$ ,  $[(\text{Zn}(\text{hfac})_2)\mathbf{3}(\mathbf{4}\text{-RS/SR})_2]$ .

a)  $^1\text{H}$ ,  $^{13}\text{C}$  NMR for 4-6 and HRMS data for 4-6

*RRSS-4* (300 MHz,  $\text{CDCl}_3$ )

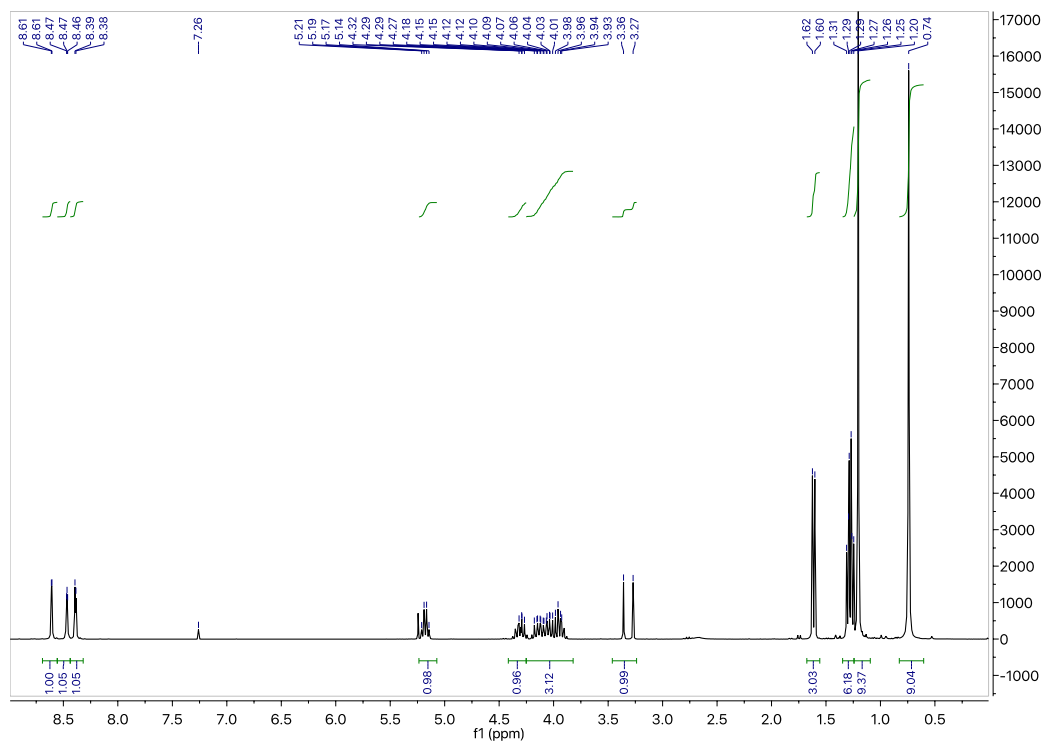

*RRSS-4* (75 MHz,  $\text{CDCl}_3$ )

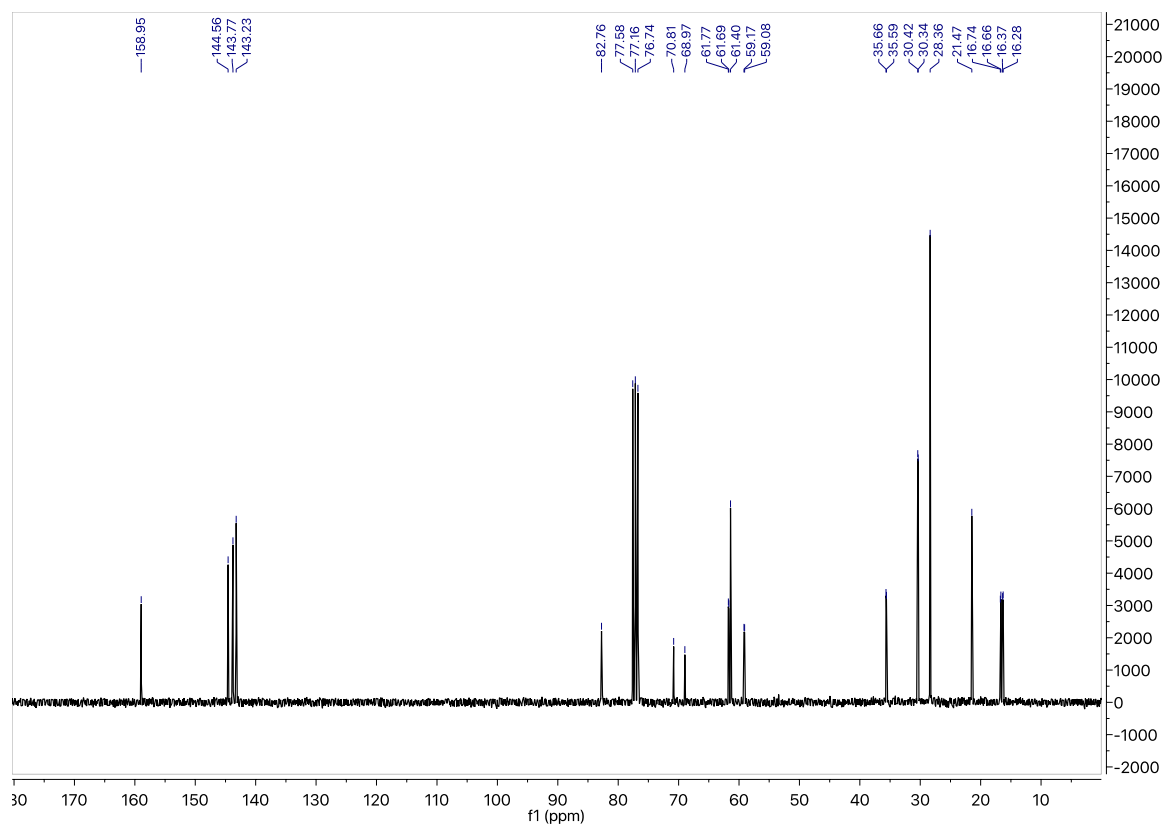

RRSS-4 (DEPT 135, CDCl<sub>3</sub>)

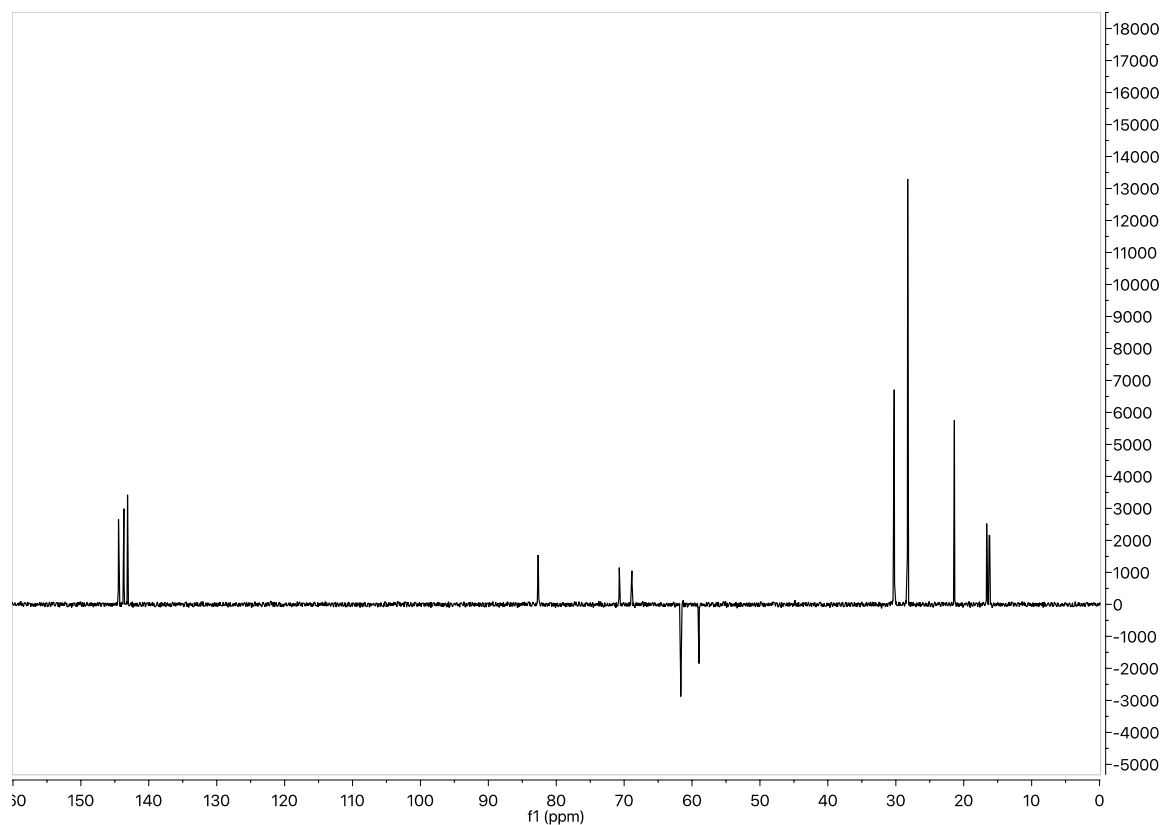

RRSS-4 HRMS

pyrazine\_RR-SS\_Mex1 1 (0.052) AM2 (Ar,18000.0,0.00,0.00); Cm (1:20)

1: TOF MS ES+  
1.43e7

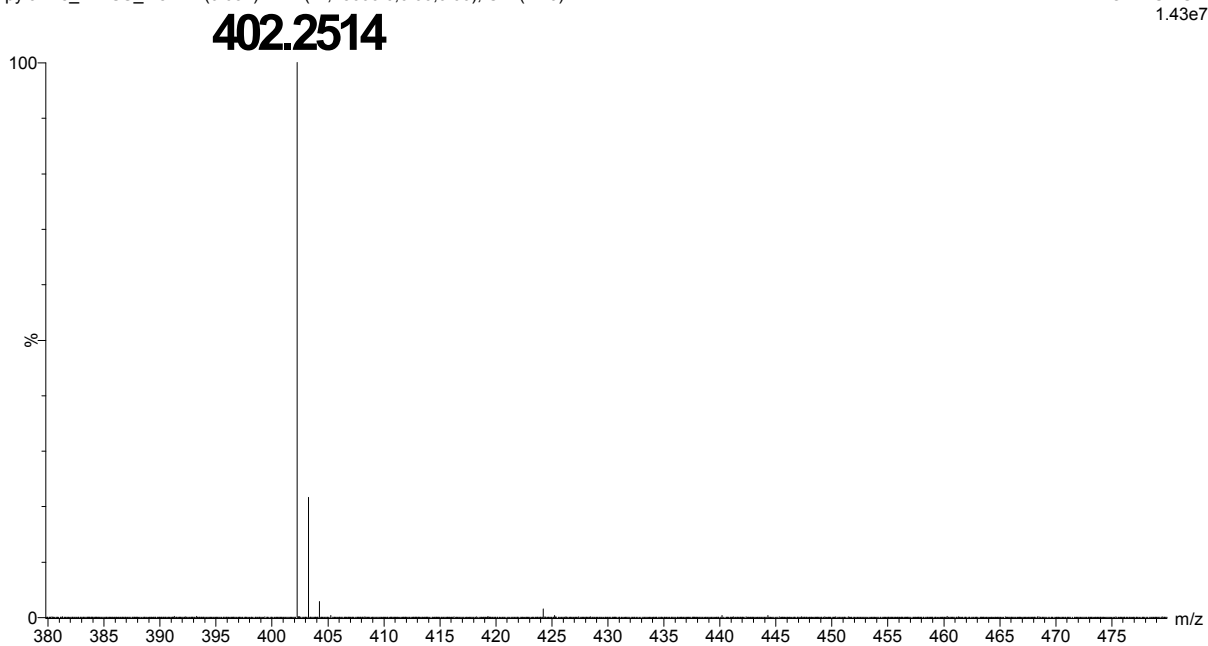

RSSR-4 (300 MHz, CDCl<sub>3</sub>)

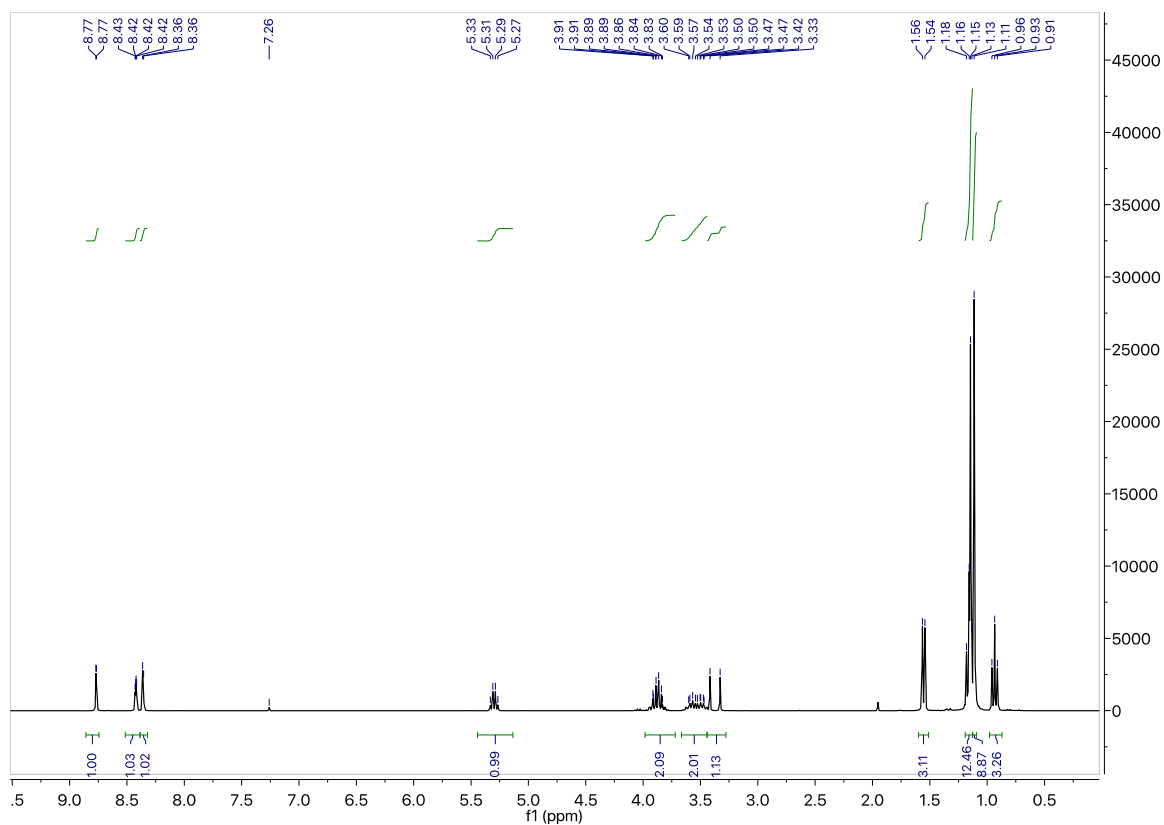

RSSR-4 (75 MHz, CDCl<sub>3</sub>)

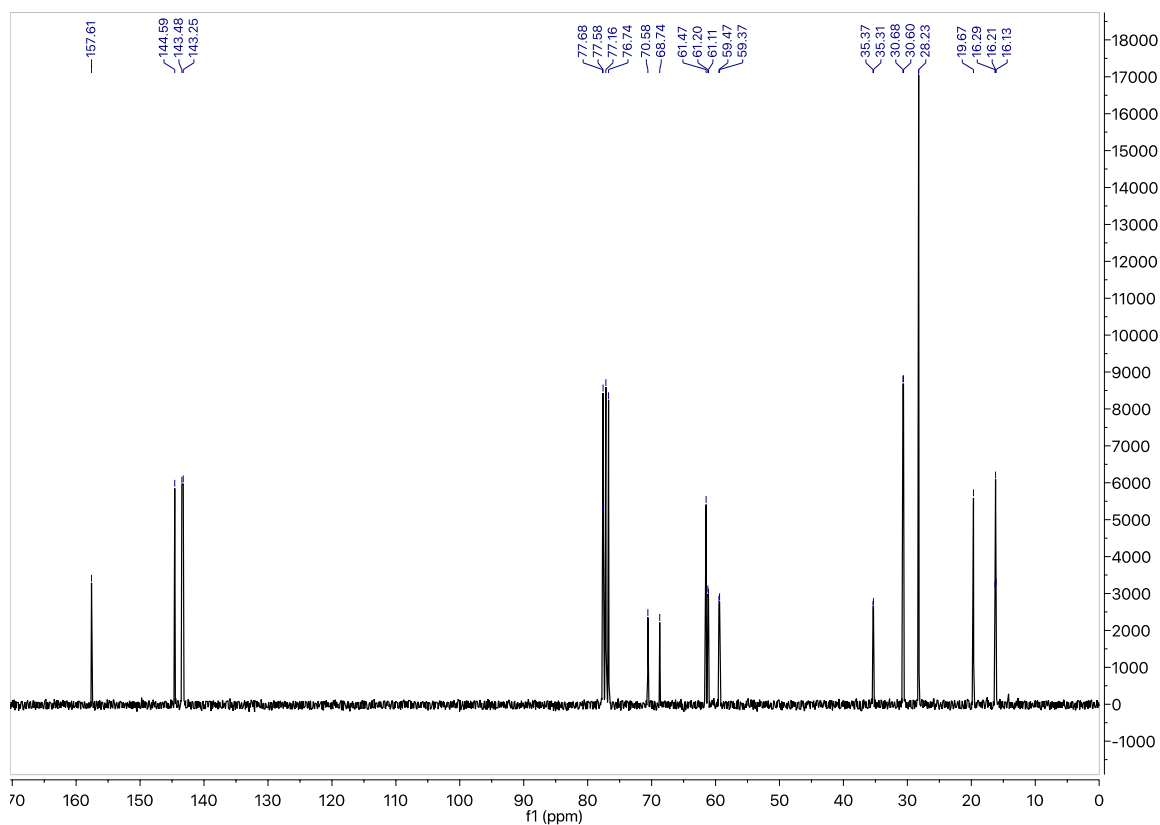

RSSR-4 (DEPT 135, CDCl<sub>3</sub>)

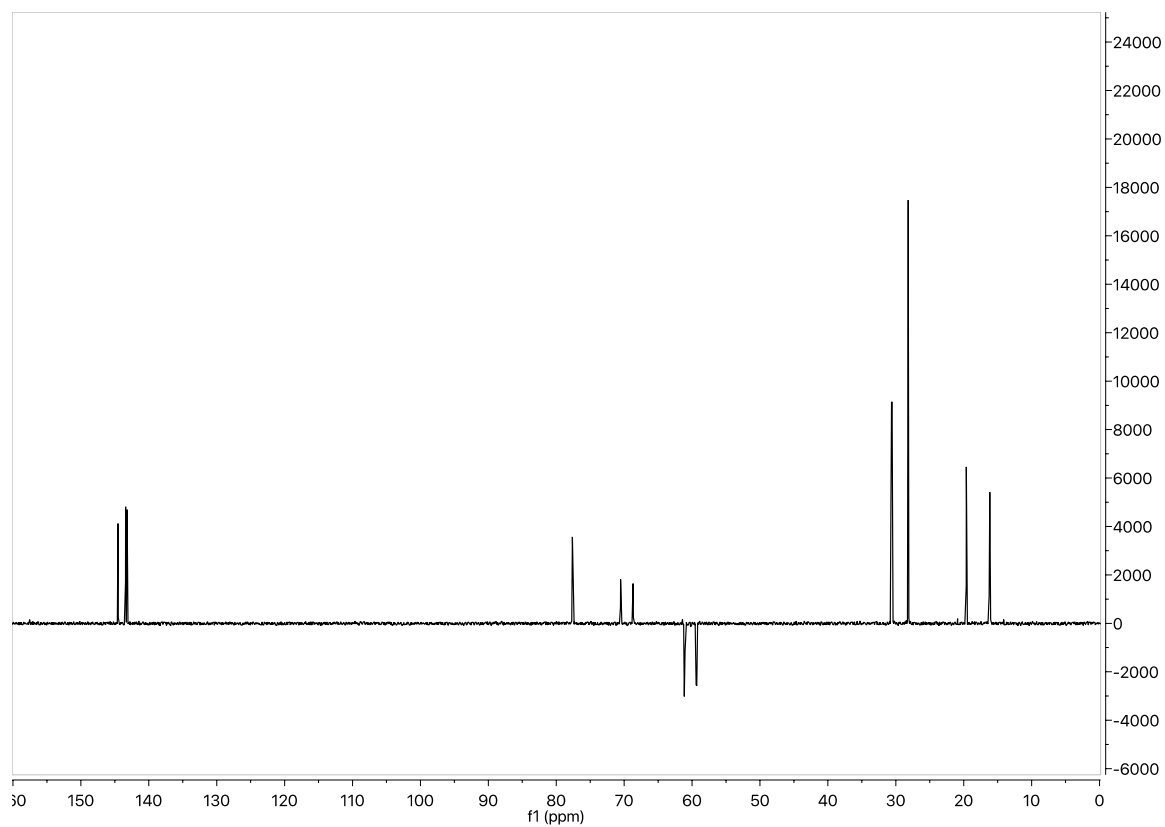

RSSR-4 HRMS

pyrazine\_RS-SR\_Mex2 3 (0.086) AM2 (Ar,18000.0,0.00,0.00); Cm (1:20)

1: TOF MS ES+  
1.57e7

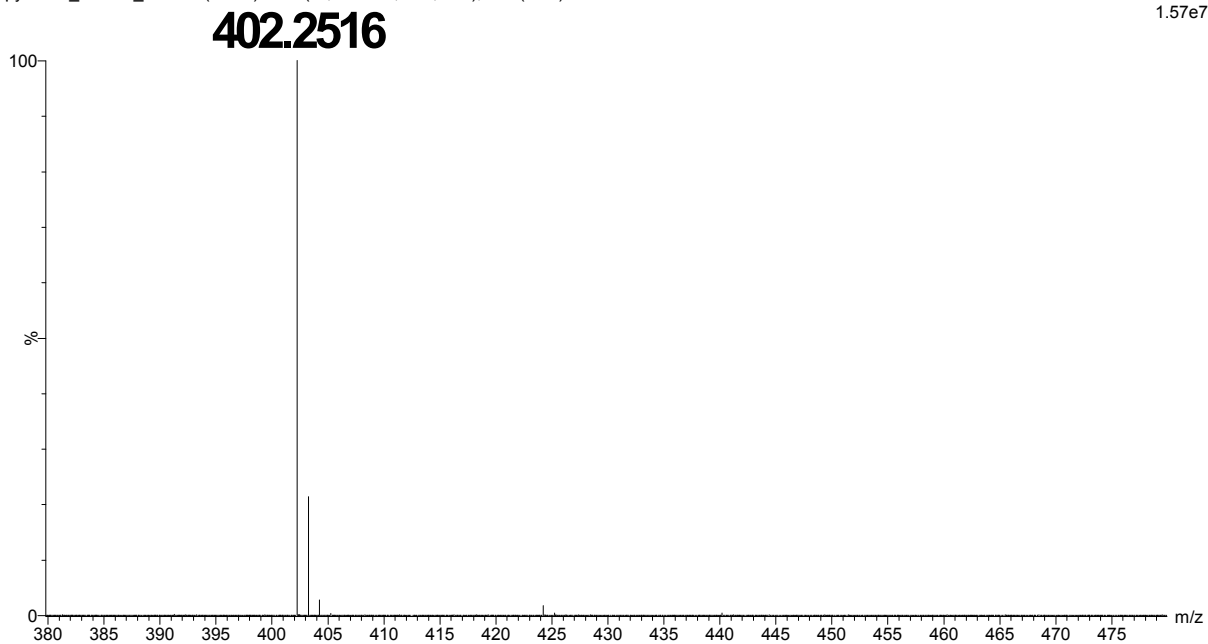

RRSS-5 (400 MHz, CDCl<sub>3</sub>)

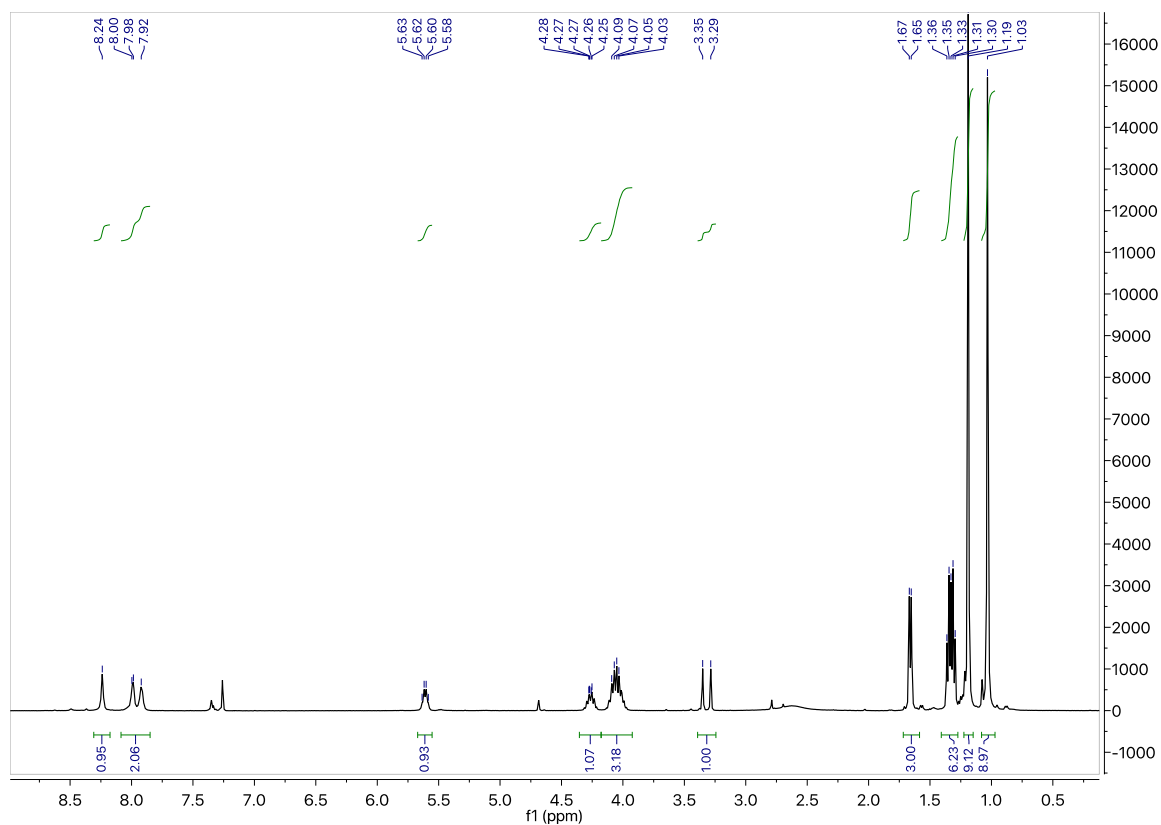

RRSS-5 (75 MHz, CDCl<sub>3</sub>)

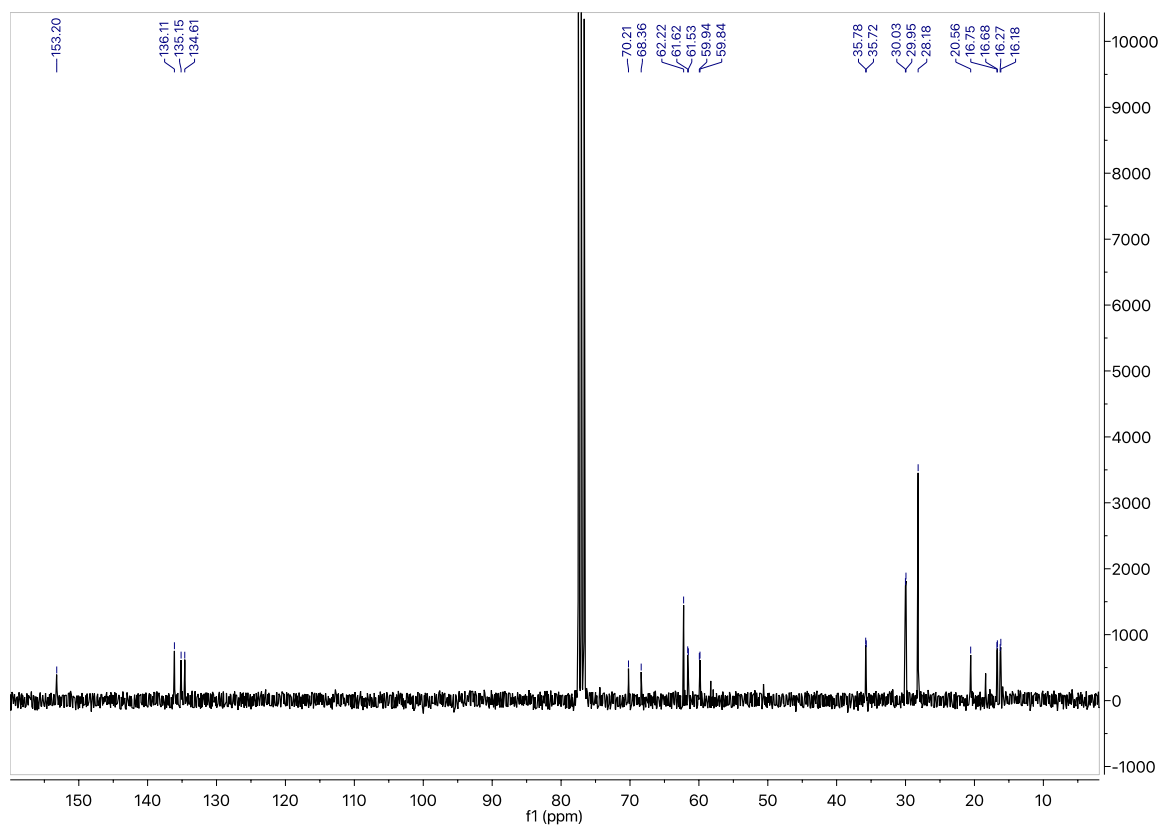

# RRSS-5 HRMS

JP948-F2-RRSS\_Mex3 2 (0.069) AM2 (Ar,18000.0,0.00,0.00); Cm (1:20)

1: TOF MS ES+  
2.56e6

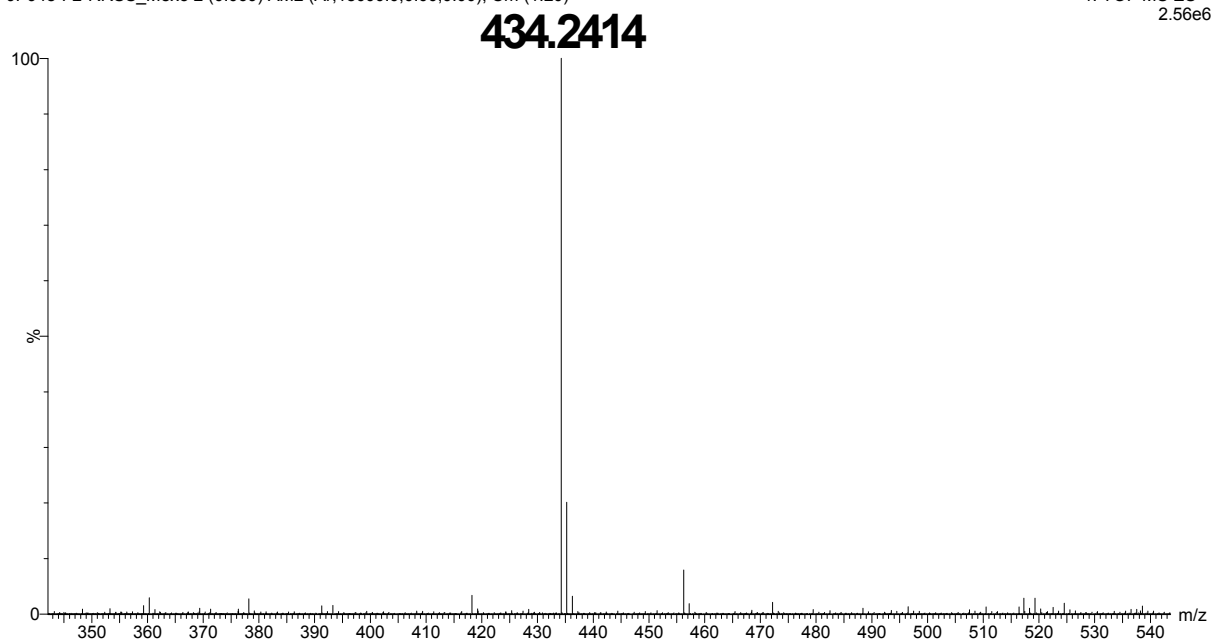

# RSSR-5 (400 MHz, CDCl<sub>3</sub>)

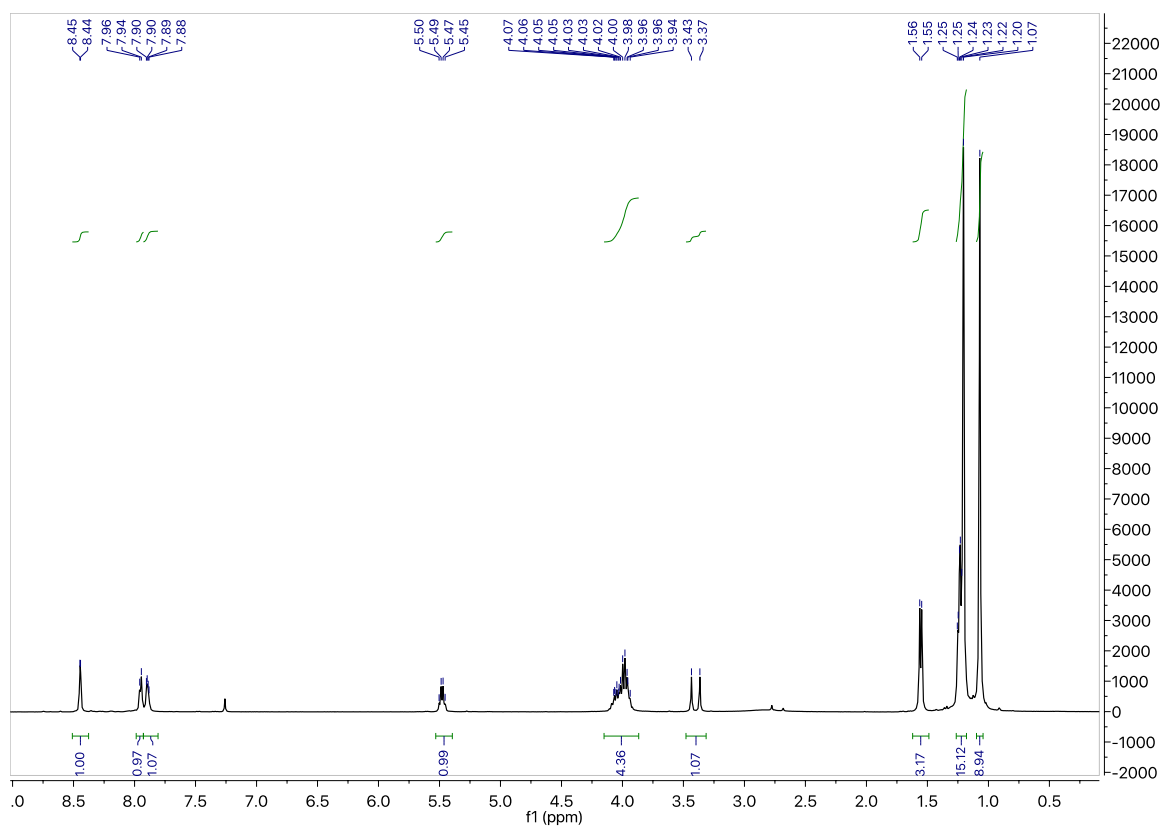



RSSR-5 (75 MHz, CDCl<sub>3</sub>)

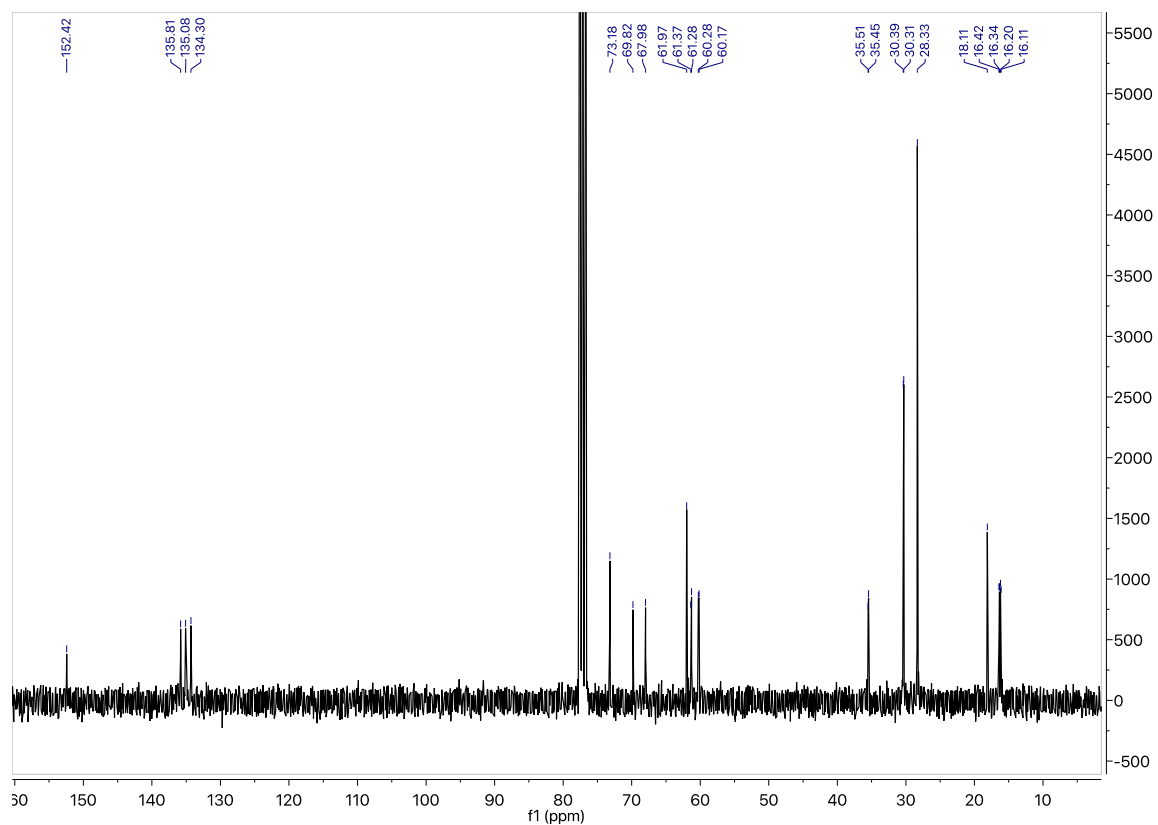

RSSR-5 HRMS

JP579F2\_Mex3 12 (0.299) AM2 (Ar, 18000.0,0.00,0.00); Cm (1:20)

1: TOF MS ES+  
1.46e7

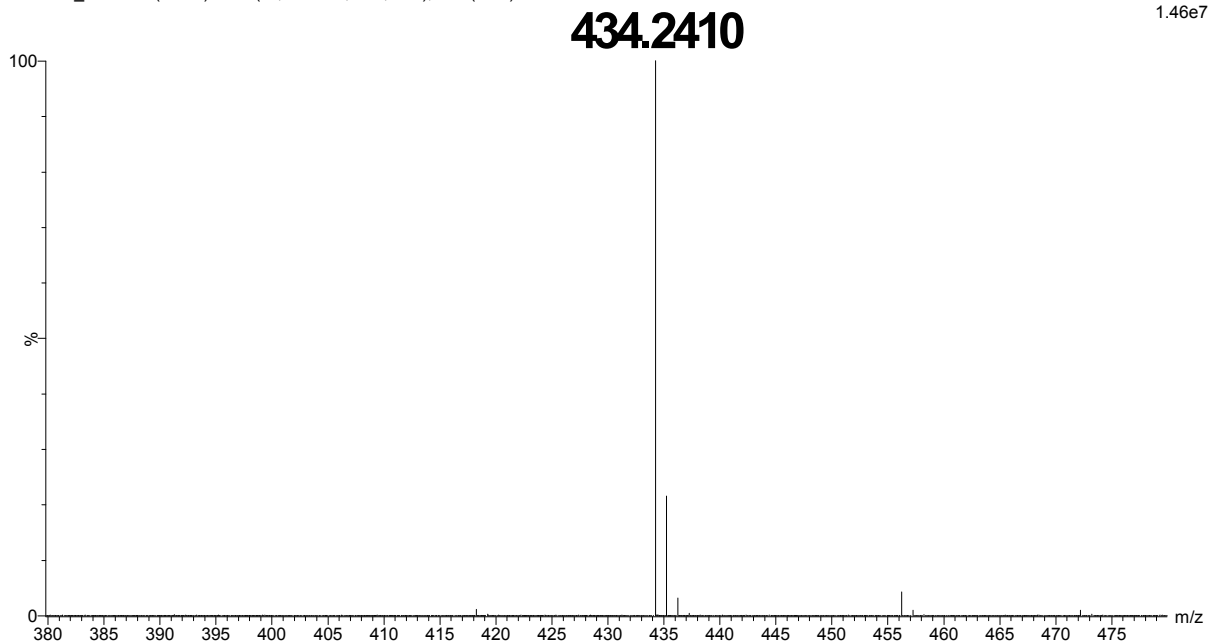

RRSS-6 (300 MHz, CDCl<sub>3</sub>)

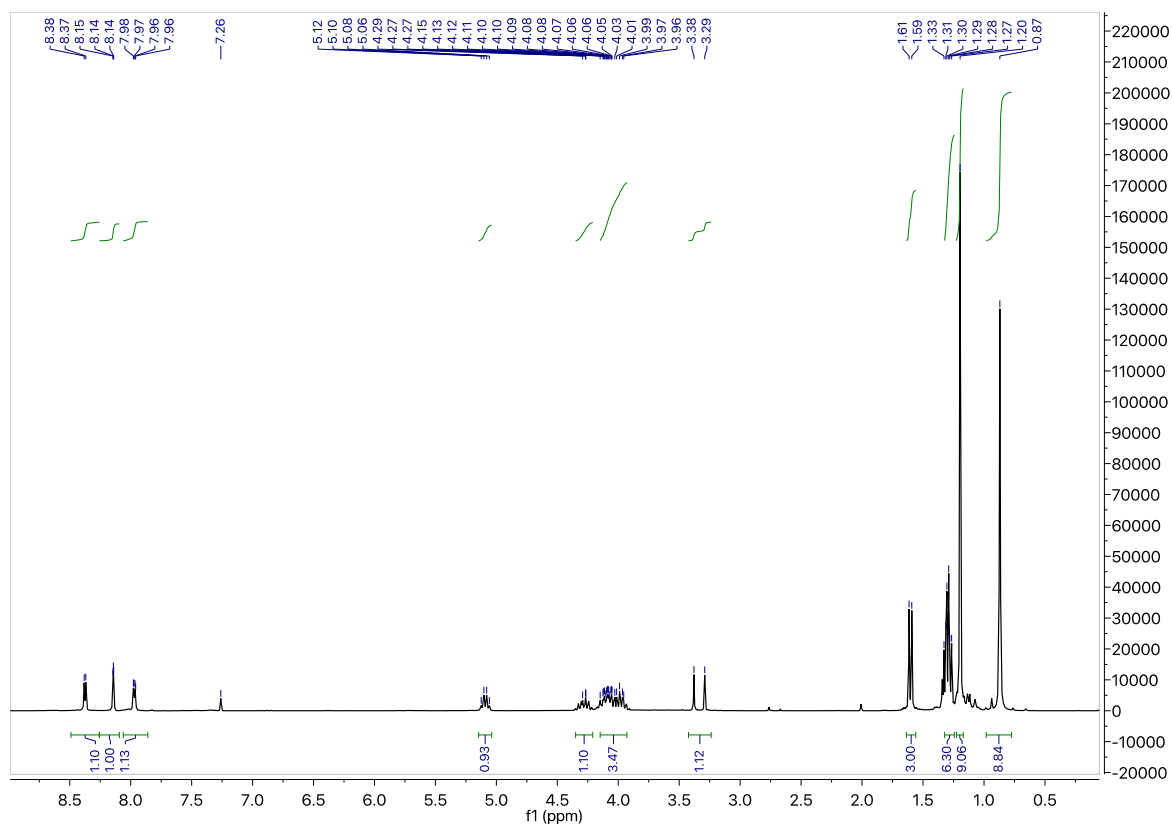

RRSS-6 (75 MHz, CDCl<sub>3</sub>)

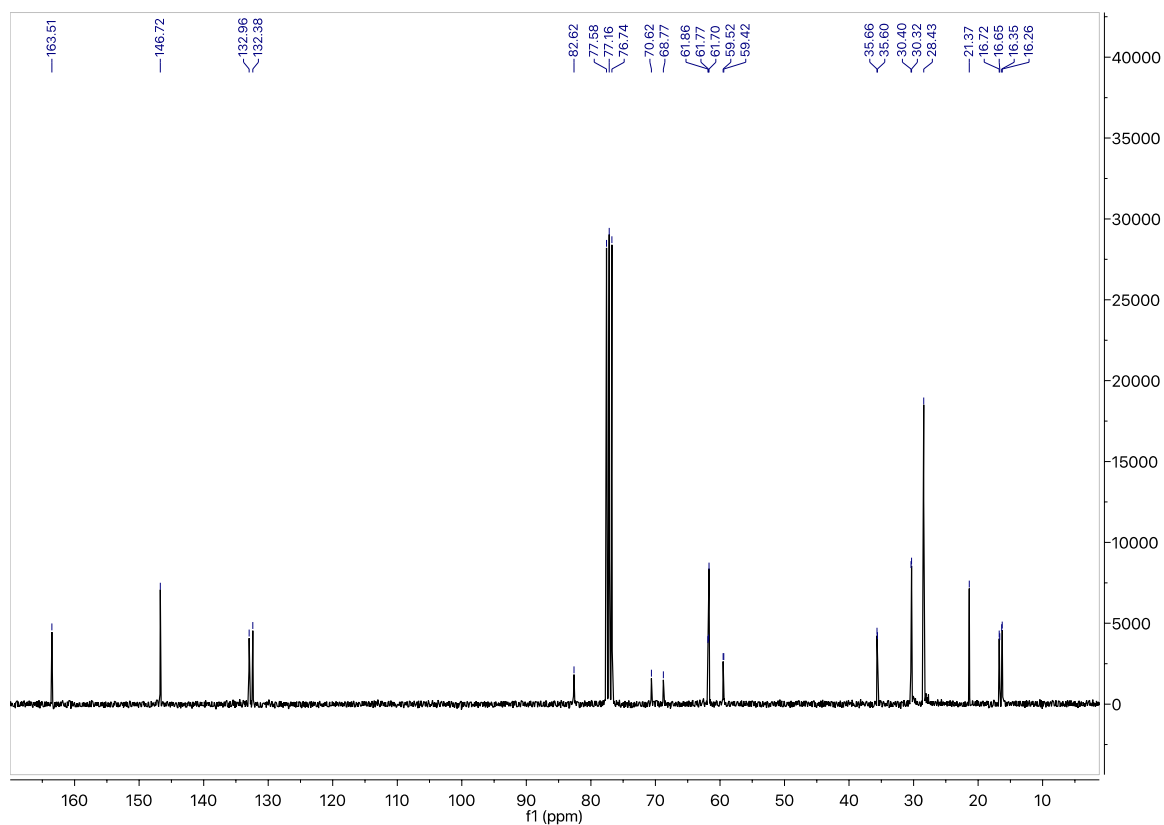

# RRSS-6 HRMS

JP948F1\_Mex1 2 (0.069) AM2 (Ar,18000.0,0.00,0.00); Cm (1:20)

1: TOF MS ES+  
2.94e7

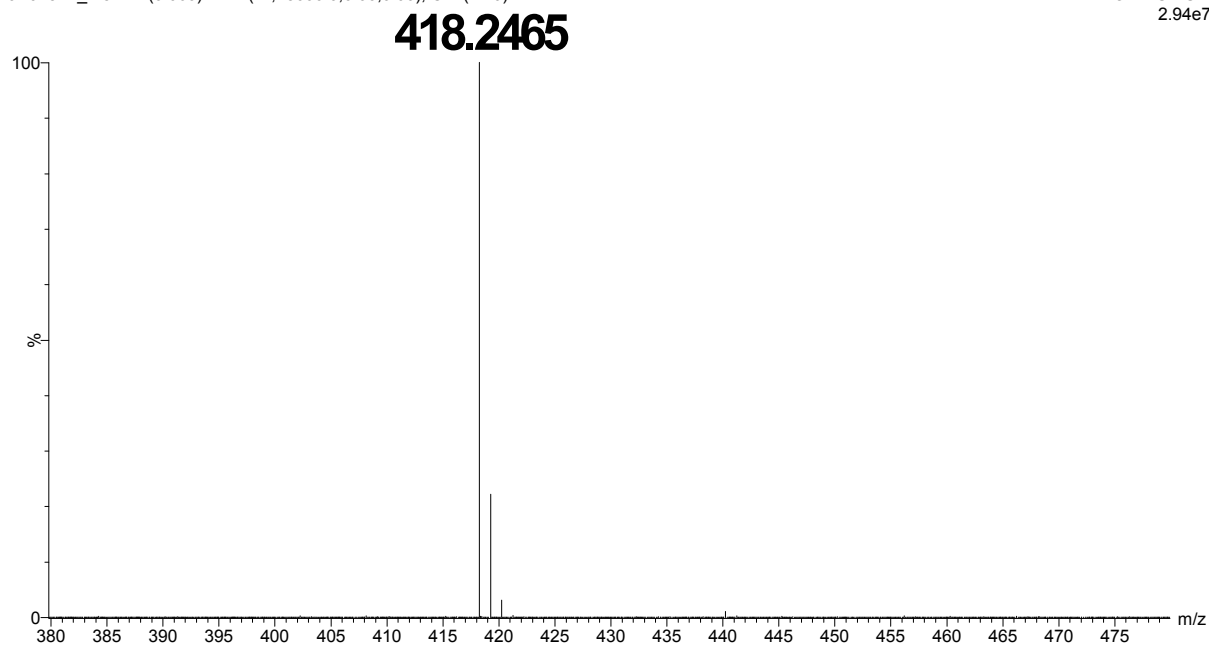

# RRSS-6 (400 MHz, CD<sub>3</sub>OD)

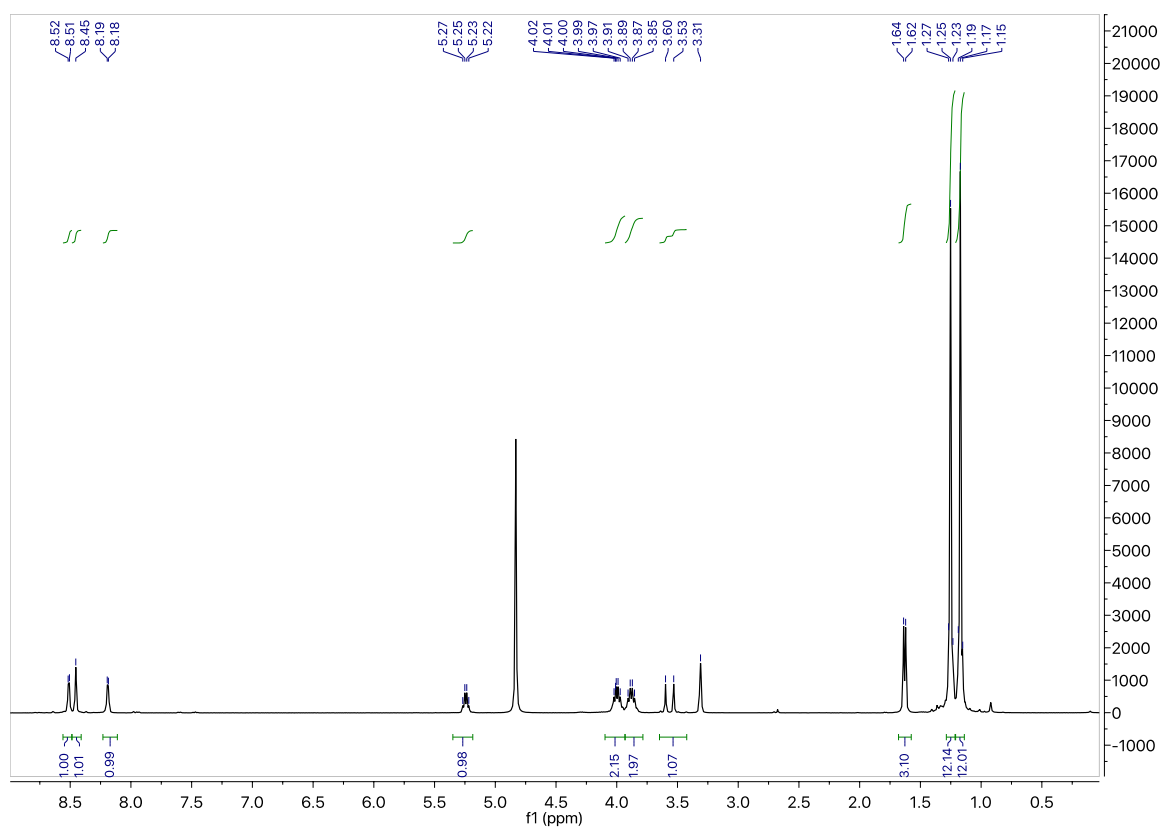

RSSR-6 (75 MHz, CDCl<sub>3</sub>)

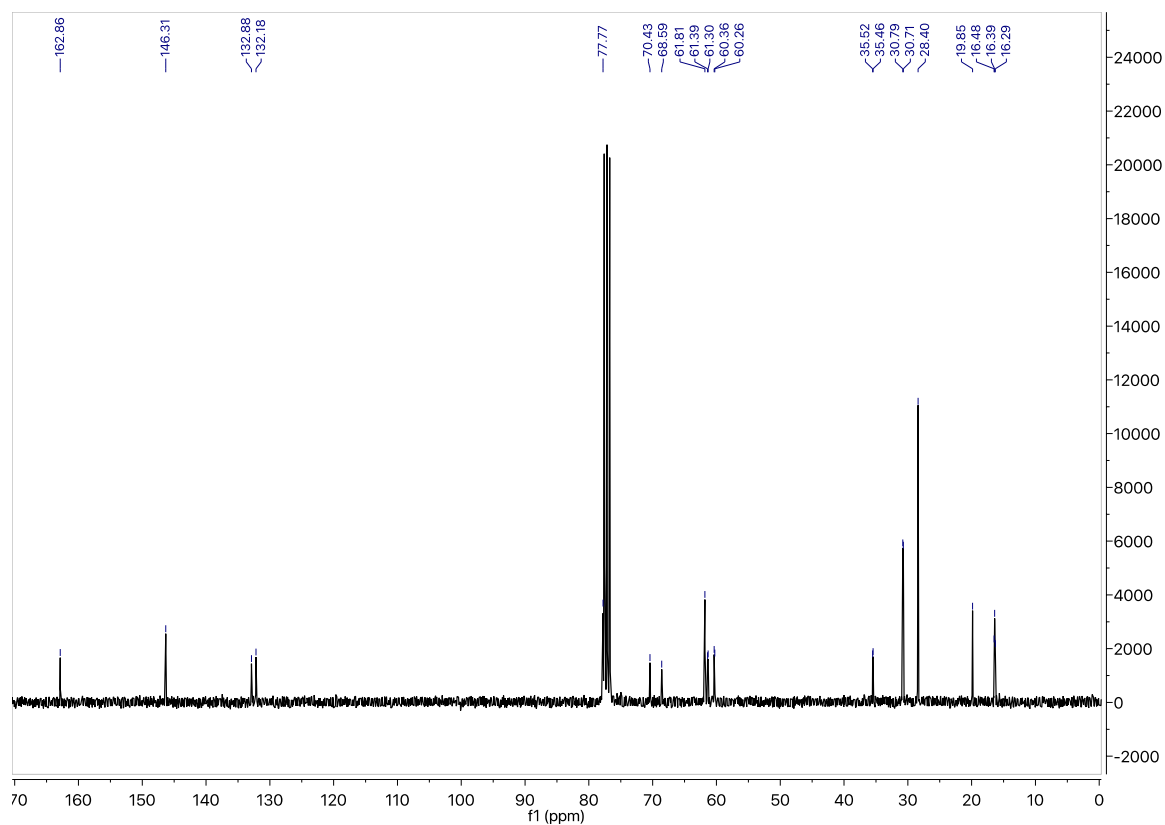

RSSR-6 HRMS

JP579F1\_Mex1 2 (0.069) AM2 (Ar,18000.0,0.00,0.00); Cm (1:20)

1: TOF MS ES+  
1.21e6

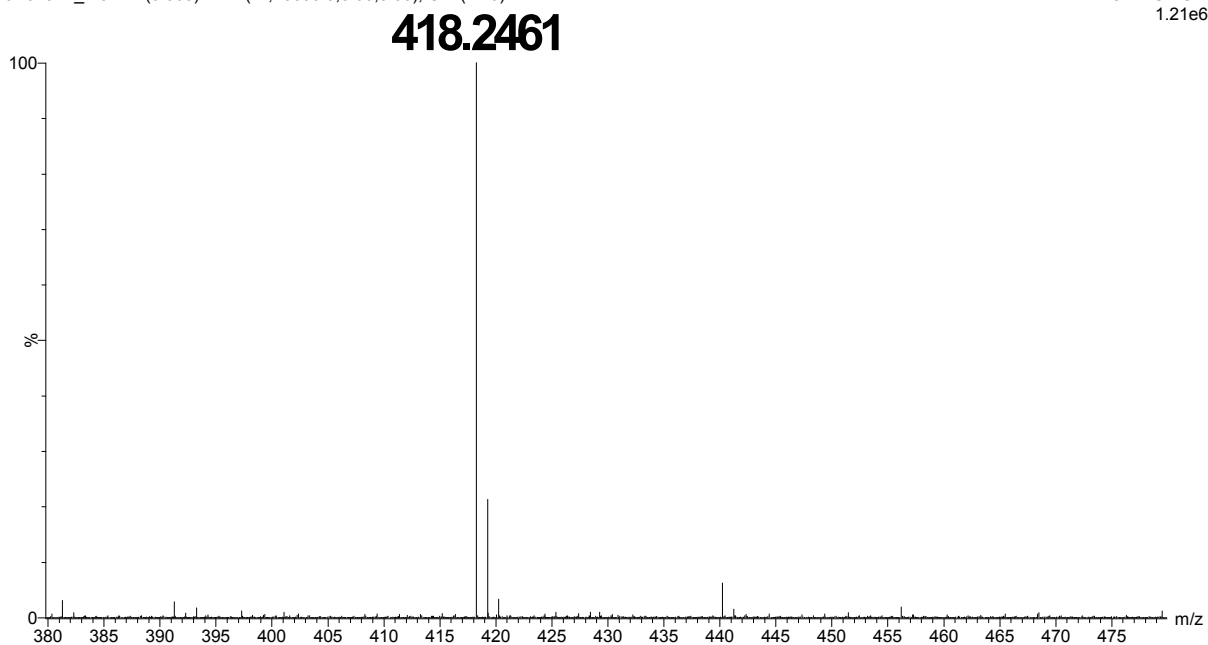

b) Measurement temperature dependence of  $k_d$  for alkoxyamine RS/SR-6.

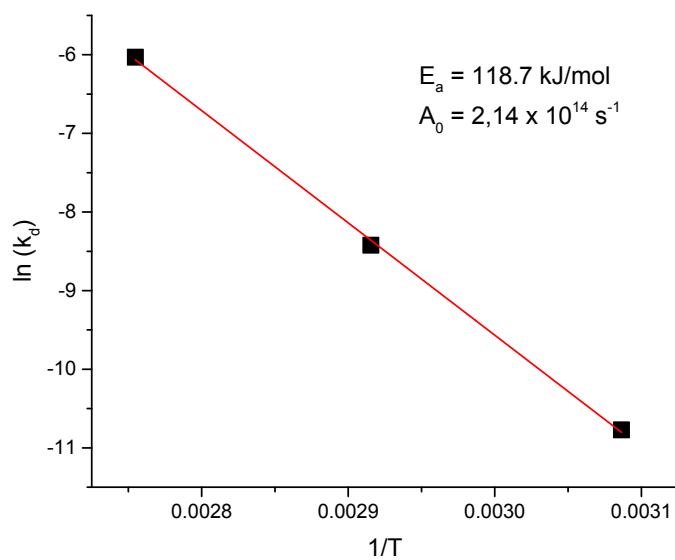

Table 1SI  $k_d$  values measured in *t*-Butylbenzene for alkoxyamine RS/SR-6

| # | T, °C | $k_d$ , s <sup>-1</sup> |
|---|-------|-------------------------|
| 1 | 324   | 2.1E-5                  |
| 2 | 343   | 2.2E-4                  |
| 3 | 363   | 0.0024                  |

c) NMR data on Py addition to the solution of  $[\text{Zn}(\text{hfac})_2(\mathbf{1-RS/SR})]$ ,  $[\text{Zn}(\text{hfac})_2(\mathbf{3-RS/SR})]$ ,  $[\text{Zn}(\text{hfac})_2(\mathbf{4-RS/SR})_2]$ .

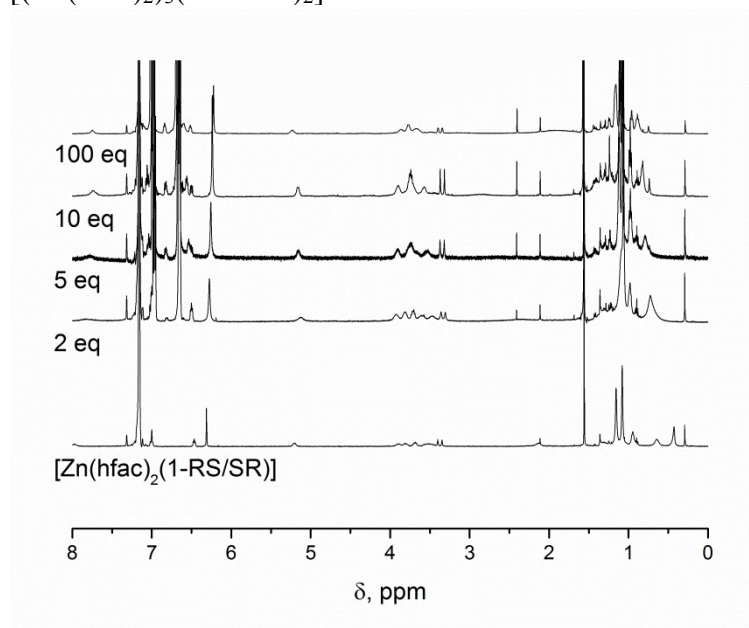

$^1\text{H}$  NMR spectroscopy of the  $[\text{Zn}(\text{hfac})_2(\mathbf{1-RS/SR})]$  (a) complex in  $\text{C}_6\text{D}_6$  (0.02 M solution) with different amounts of Py as a competitor.

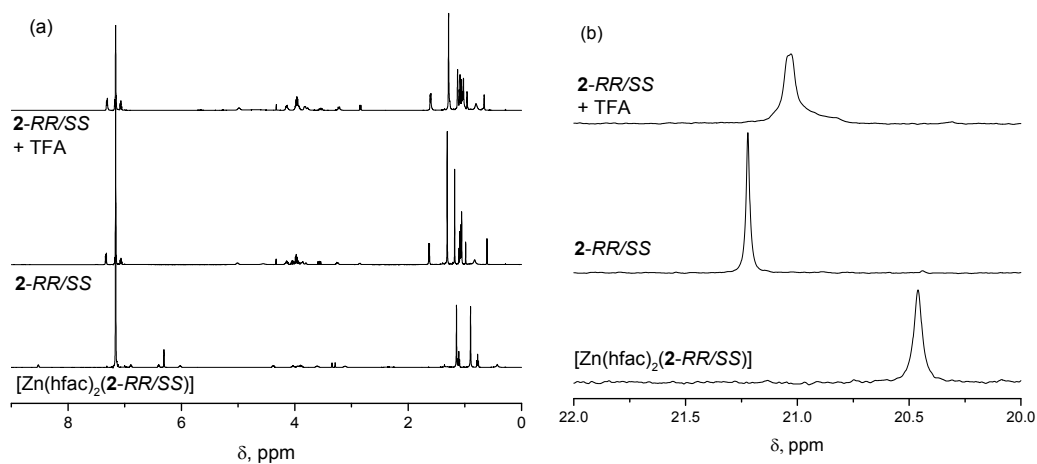

$^1\text{H}$  and  $^{31}\text{P}$  NMR spectroscopy of the  $[\text{Zn}(\text{hfac})_2(\mathbf{2-RR/SS})]$  complex in  $\text{C}_6\text{D}_6$  (0.02 M solution) along with 2-RR/SS and 2-RR/SS in the presence of 1 eq. of TFA.

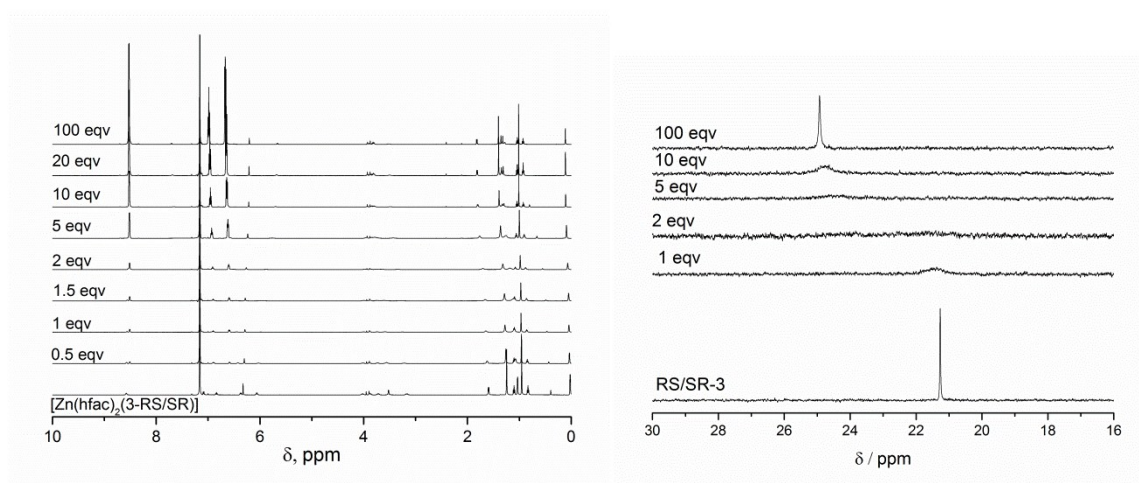

$^1\text{H}$  and  $^{31}\text{P}$  NMR spectroscopy of the  $[\text{Zn}(\text{hfac})_2(\mathbf{3}\text{-RS/SR})]$  complex in  $\text{C}_6\text{D}_6$  (0.02 M solution) with different amounts of Py as a competitor.

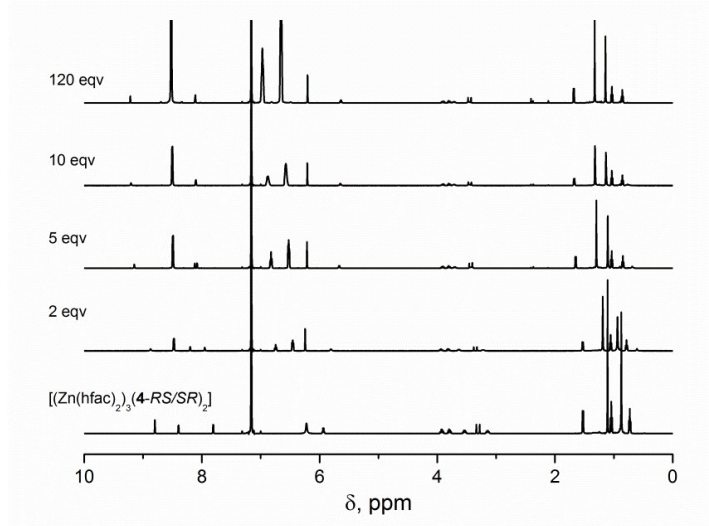

$^1\text{H}$  NMR spectroscopy of the  $[(\text{Zn}(\text{hfac})_2)_3(\mathbf{4}\text{-RS/SR})_2]$  complex in  $\text{C}_6\text{D}_6$  (0.02 M solution) with different amounts of Py as a competitor.

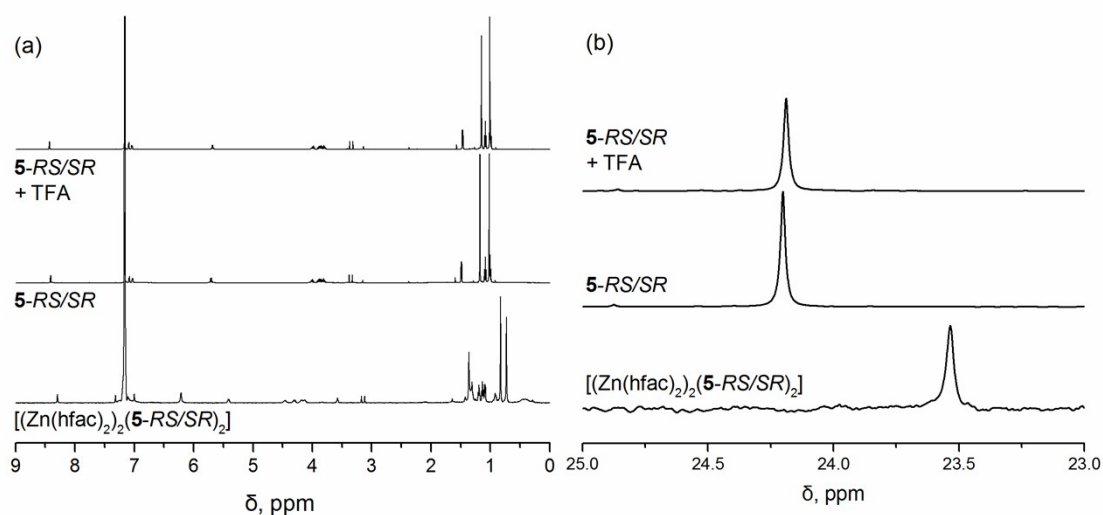

$^1\text{H}$  (a) and  $^{31}\text{P}$  (b) NMR spectroscopy of the  $[\text{Zn}(\text{hfac})_2(\mathbf{5}\text{-RS/SR})_2]$  complex in  $\text{C}_6\text{D}_6$  (0.02 M solution) along with  $\mathbf{5}\text{-RS/SR}$  and  $\mathbf{5}\text{-RS/SR}$  in the presence of 1 eqv. of TFA.
